# Supplementary material for: Peripheral Auditory Function in Tanzanian Children Living With HIV With Clinically Normal Hearing
Source: PubMed Central journal article supplement (PMC10018326; doi:10.1001/jamanetworkopen.2023.3061), 2023-03-15
Supplement: jamanetwopen-e233061-s002.pdf [file jamanetwopen-e233061-s002.pdf]

## Data Sharing Statement

Niemczak. Peripheral Auditory Function in Tanzanian Children Living With HIV With Clinically Normal Hearing. *JAMA Netw Open*. Published March 15, 2023.

doi:10.1001/jamanetworkopen.2023.3061

### Data

**Data available:** No

### Additional Information

**Explanation for why data not available:** The data will be made available upon request.
